# Supplementary material for: Longitudinal Patterns of Social Problem-Solving Skills in an Ethnically Diverse Sample of Pediatric Patients with Cancer and their Caregivers
Source: MDPI journal article supplement (doi:10.3390/ijerph17051581), 2020-02-29
Supplement: s1 [file s1]

## Supplementary Tables and Figures

**Table S1.** Overview of the SPSI-A Subscales.

| Domain                                   | Scale Abbreviation | Definition of Social Problem-Solving Domain                                                                                                                                                                                                                                                         |
|------------------------------------------|--------------------|-----------------------------------------------------------------------------------------------------------------------------------------------------------------------------------------------------------------------------------------------------------------------------------------------------|
| Automatic Process                        | APS                | Individual will automatically or over time apply strategies that were previously successful in solving similar conflicts.                                                                                                                                                                           |
| Evaluation Process                       | EVL                | This process is used when an individual cannot solve the problem by applying automatic or habitual strategies that were successful in solving other problems. This process utilizes two separate strategies: problem-orientation and problem-solving skills.                                        |
| Problem Orientation                      | POS                | This is the motivational component of social problem-solving and addresses individual beliefs, attitudes, and values regarding the social problem-solving process for solving real-life problems.                                                                                                   |
| Cognition                                | COG                | Person has confidence in his/her intellectual capacities to engage in the social problem-solving process                                                                                                                                                                                            |
| Emotion                                  | EMO                | Feelings that a person experiences when the person is faced with the need to solve a problem                                                                                                                                                                                                        |
| Behavior                                 | BEH                | Willingness of a person to approach the problem rather than avoiding the process                                                                                                                                                                                                                    |
| Problem-Solving Skills                   | PSSS               | The combination of all of these skills together are critical for the success of the social problem-solving model.                                                                                                                                                                                   |
| Problem Identification                   | PID                | Identify that a problem exists through the use of cues, attitudes, emotions, behaviors, and physiologic responses.                                                                                                                                                                                  |
| Alternative Generation                   | ALT                | This is the cognitive skill of brain storming or free-associating by generating a list of alternative options or solutions for the identified problem.                                                                                                                                              |
| Consequence Prediction                   | CON                | Individuals attempt to predict consequences of each solution, including weighing the advantages and disadvantages of each solution.                                                                                                                                                                 |
| Implementation/Evaluation/Reorganization | IMP/EVL/REO        | Individual will implement the selected solution by creating a strategic plan of action. Progress is evaluated by successful goal attainment. If the problem is not solved, the individual will re-organize their process and re-evaluate another solution until the problem is successfully solved. |

**Table S2.** Overview of the SPSI-R:L Subscales.

| Domain                                | Scale Abbreviation | Definition of Social Problem-Solving Domain                                                                                                                                                                                                                                                                                           |
|---------------------------------------|--------------------|---------------------------------------------------------------------------------------------------------------------------------------------------------------------------------------------------------------------------------------------------------------------------------------------------------------------------------------|
| Positive Problem Orientation          | PPO                | Individuals with higher scores are likely to appraise a problem as a challenge rather than a threat and will believe that their problem is solvable                                                                                                                                                                                   |
| Negative Problem Orientation          | NPO                | Measures a dysfunctional or inhibitive cognitive-emotional set. Higher scores are likely to indicate a problem as a significant threat to well-being, doubt personal abilities to solve problems successfully, and become frustrated or upset when confronted with problems                                                           |
| Relational Problem-Solving Scale      | RPS                | Assesses the rational, deliberate, and systematic application of effective problem-solving strategies. Higher scores indicate individuals who carefully and systematically solve problems                                                                                                                                             |
| Problem Definition/ Formulation       | PDF                | Higher scores indicate individuals will try to clarify and understand the problem by gathering facts, focusing on specific and concrete information, identifying obstacles, and setting a specific goal for problem-solving                                                                                                           |
| Generation of Alternative Solutions   | GAS                | Higher scores indicate individuals will focus on their problem-solving goals and attempt to generate as many alternative solutions as possible                                                                                                                                                                                        |
| Decision Making                       | DM                 | Higher scores indicate that individuals will try to predict the positive and negative consequences of each solution alternative, considering both immediate and long-term consequences as well as personal and social consequences                                                                                                    |
| Solution Implementation/ Verification | SIV                | Higher scores indicate individuals will practice their chosen solutions to increase their chances of success and will evaluate how much the situation and their emotions have changed for the better. If the outcome is not satisfactory, individuals will re-evaluate their solutions and will attempt problem-solving process again |
| Impulsivity-Carelessness Scale        | ICS                | Higher scores indicate individuals who consider only a few solution alternatives; impulsively going with the first idea that comes to mind                                                                                                                                                                                            |
| Avoidance Style Scale                 | AS                 | Higher scores indicate more likely to avoid problems rather than confront them or procrastinate with solving problems                                                                                                                                                                                                                 |

**Table S3.** Percentage of Patients in each Problem-Solving Category for each Subscale (SPSI-A).

| <b>BASELINE</b>             | <b>APS</b> | <b>COG</b> | <b>EMO</b> | <b>BEH</b> | <b>PID</b> | <b>ALT</b> | <b>CON</b> | <b>IMP</b> | <b>EVL</b> | <b>REO</b> |
|-----------------------------|------------|------------|------------|------------|------------|------------|------------|------------|------------|------------|
| Ineffective Problem-Solvers | 26.9       | 35.8       | 18.7       | 32.1       | 25.4       | 29.1       | 30.6       | 27.6       | 27.6       | 22.4       |
| Average Problem-Solvers     | 46.3       | 35.8       | 53.0       | 47.0       | 48.5       | 42.5       | 42.5       | 48.5       | 43.3       | 50.7       |
| Effective Problem-Solvers   | 26.9       | 28.4       | 28.4       | 20.9       | 26.1       | 28.4       | 26.9       | 23.9       | 29.1       | 26.9       |
| <b>6 MONTH</b>              | <b>APS</b> | <b>COG</b> | <b>EMO</b> | <b>BEH</b> | <b>PID</b> | <b>ALT</b> | <b>CON</b> | <b>IMP</b> | <b>EVL</b> | <b>REO</b> |
| Ineffective Problem-Solvers | 29.2       | 31.5       | 20         | 33.8       | 22.3       | 25.4       | 27.7       | 23.1       | 25.4       | 26.9       |
| Average Problem-Solvers     | 42.3       | 30.8       | 51.5       | 42.3       | 53.8       | 51.5       | 46.9       | 50.8       | 45.4       | 41.5       |
| Effective Problem-Solvers   | 28.5       | 37.7       | 28.5       | 23.8       | 23.8       | 23.1       | 25.4       | 26.2       | 29.2       | 31.5       |
| <b>15 MONTH</b>             | <b>APS</b> | <b>COG</b> | <b>EMO</b> | <b>BEH</b> | <b>PID</b> | <b>ALT</b> | <b>CON</b> | <b>IMP</b> | <b>EVL</b> | <b>REO</b> |
| Ineffective Problem-Solvers | 26.7       | 29.2       | 19.3       | 30.3       | 27.7       | 25.2       | 32.8       | 20.2       | 28.6       | 27.7       |
| Average Problem-Solvers     | 49.2       | 38.3       | 52.9       | 43.7       | 47.1       | 49.6       | 39.5       | 52.9       | 35.3       | 43.7       |
| Effective Problem-Solvers   | 24.2       | 32.5       | 27.7       | 26.1       | 25.2       | 25.2       | 27.7       | 26.9       | 36.1       | 28.6       |

**Table S4.** Percentage of Caregivers in each Problem-Solving Category for each Subscale (SPSI-R:L).

| <b>BASELINE</b>                  | <b>PPO</b> | <b>NPO</b> | <b>RPS</b> | <b>ICS</b> | <b>AS</b> | <b>PDF</b> | <b>GAS</b> | <b>DM</b> | <b>SIV</b> |
|----------------------------------|------------|------------|------------|------------|-----------|------------|------------|-----------|------------|
| Extreme Above Norm Group Average | 0.0        | 0.0        | 0.0        | 0.7        | 0.7       | 0.0        | 0.0        | 0.0       | 0          |
| Very Much Above Norm Group       | 0.7        | 2.2        | 1.4        | 1.4        | 3.6       | 1.4        | 0.0        | 1.4       | 2.9        |
| Above Norm Group Average         | 10.1       | 10.8       | 11.5       | 6.5        | 5.8       | 11.5       | 10.1       | 10.8      | 11.6       |
| Norm Group Average               | 49.6       | 54.0       | 52.5       | 51.1       | 66.2      | 51.8       | 59.7       | 54.7      | 52.2       |
| Below Norm Group Average         | 31.7       | 30.9       | 23.0       | 36.7       | 23.0      | 23.7       | 17.3       | 20.9      | 25.4       |
| Very Much Below Norm Group       | 5.8        | 2.2        | 10.1       | 3.6        | 0.7       | 9.4        | 9.4        | 11.5      | 6.5        |
| Extreme Below Norm Group Average | 2.2        | 0.0        | 1.4        | 0.0        | 0.0       | 2.2        | 3.6        | 0.7       | 1.4        |
| <b>6 MONTH</b>                   | <b>PPO</b> | <b>NPO</b> | <b>RPS</b> | <b>ICS</b> | <b>AS</b> | <b>PDF</b> | <b>GAS</b> | <b>DM</b> | <b>SIV</b> |
| Extreme Above Norm Group Average | 0.0        | 0.0        | 0.0        | 0.0        | 0.0       | 0.0        | 0.0        | 0.0       | 0          |
| Very Much Above Norm Group       | 0.8        | 3.8        | 1.5        | 0.0        | 0.8       | 1.5        | 0.8        | 3.0       | 2.3        |
| Above Norm Group Average         | 9.8        | 5.3        | 8.3        | 5.3        | 6.0       | 9.8        | 9.8        | 6.8       | 12.9       |
| Norm Group Average               | 56.4       | 50.4       | 59.1       | 42.9       | 69.2      | 51.9       | 60.2       | 55.3      | 54.5       |
| Below Norm Group Average         | 23.3       | 38.3       | 18.9       | 48.1       | 23.3      | 24.1       | 20.3       | 23.5      | 22.7       |
| Very Much Below Norm Group       | 7.5        | 2.3        | 10.6       | 3.8        | 0.8       | 10.5       | 8.3        | 11.4      | 7.6        |
| Extreme Below Norm Group Average | 2.3        | 0.0        | 1.5        | 0.0        | 0.0       | 2.3        | 0.8        | 0.0       | 0          |
| <b>15 MONTH</b>                  | <b>PPO</b> | <b>NPO</b> | <b>RPS</b> | <b>ICS</b> | <b>AS</b> | <b>PDF</b> | <b>GAS</b> | <b>DM</b> | <b>SIV</b> |
| Extreme Above Norm Group Average | 0.0        | 0.0        | 0.0        | 0.0        | 0.0       | 0.0        | 0.0        | 0.0       | 0          |
| Very Much Above Norm Group       | 0.0        | 0.0        | 3.3        | 0.0        | 0.8       | 1.7        | 0.8        | 0.8       | 1.7        |
| Above Norm Group Average         | 11.6       | 3.3        | 9.1        | 3.3        | 5.8       | 12.5       | 13.2       | 13.2      | 11.6       |
| Norm Group Average               | 57.9       | 51.2       | 53.7       | 51.2       | 73.6      | 49.2       | 57.0       | 47.1      | 55.4       |
| Below Norm Group Average         | 20.7       | 41.3       | 23.1       | 42.1       | 19.8      | 25.8       | 17.4       | 24.8      | 24         |
| Very Much Below Norm Group       | 9.9        | 4.1        | 8.3        | 3.3        | 0.0       | 8.3        | 9.1        | 12.4      | 6.6        |
| Extreme Below Norm Group Average | 0.0        | 0.0        | 2.5        | 0.0        | 0.0       | 2.5        | 2.5        | 1.7       | 0.8        |

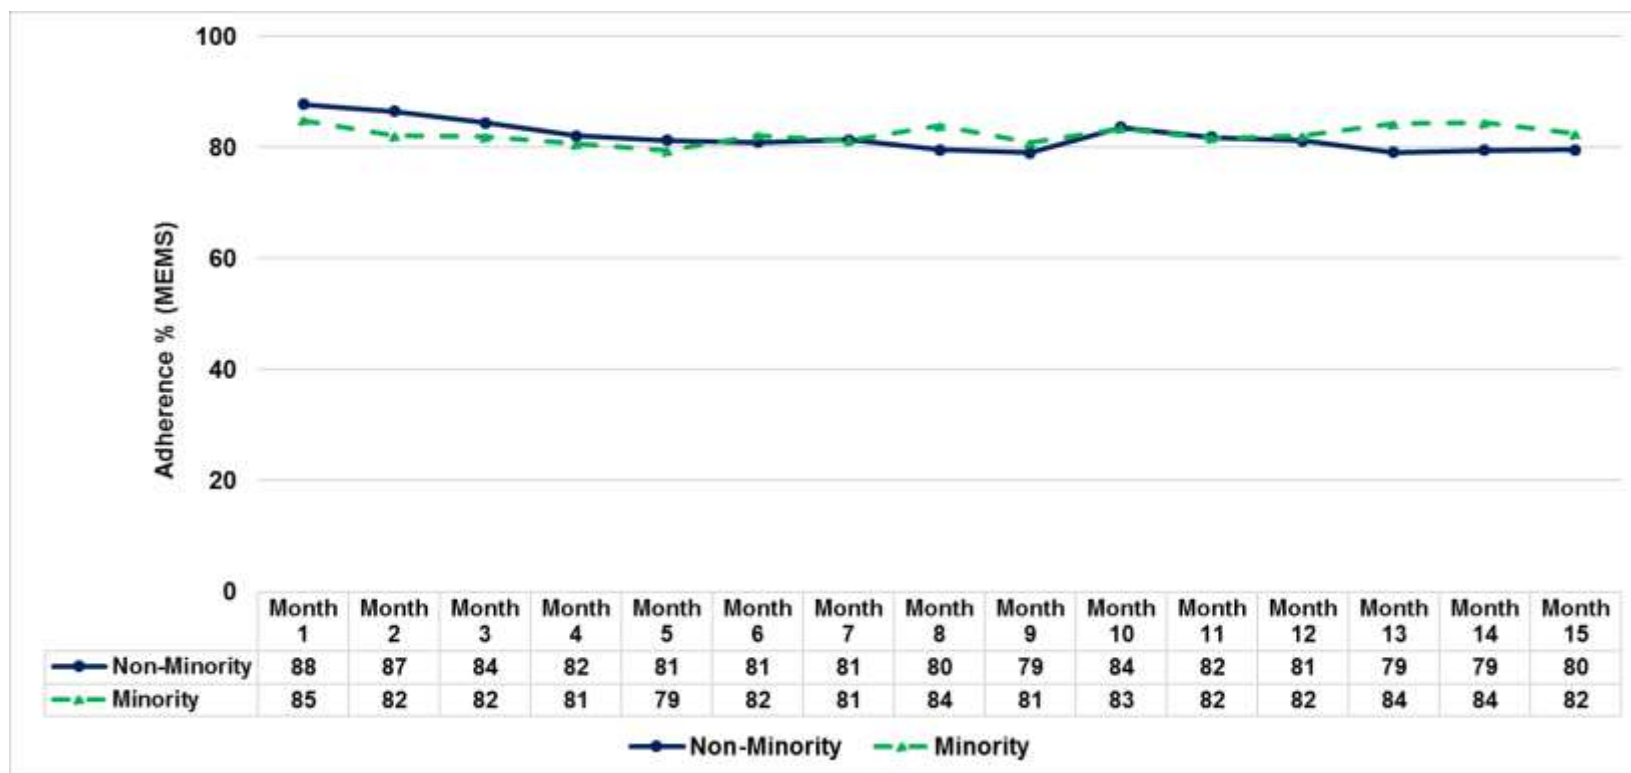

**Figure S1.** Medication Adherence Rates between Minority versus Non-Minority Patients.
